# Supplementary material for: 1α,25-dihydroxyvitamin D3 in combination with transforming growth factor-β increases the frequency of Foxp3+ regulatory T cells through preferential expansion and usage of interleukin-2
Source: PubMed Central journal article supplement (PMC4137955; doi:10.1111/imm.12289), 2014-07-29
Supplement: imm0143-0052-sd2.pdf [file imm0143-0052-sd2.pdf]

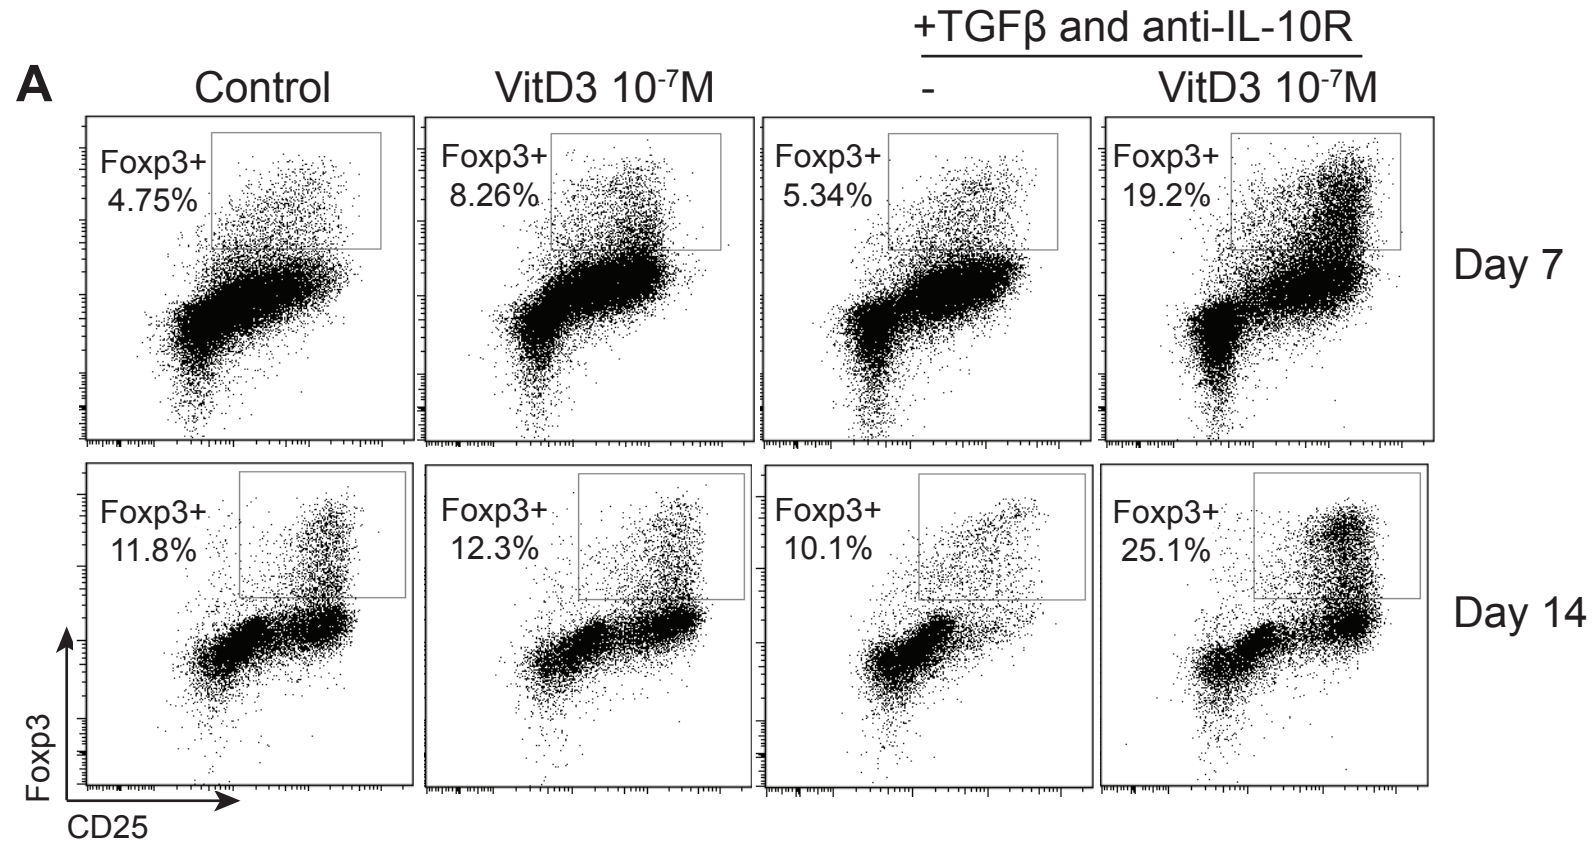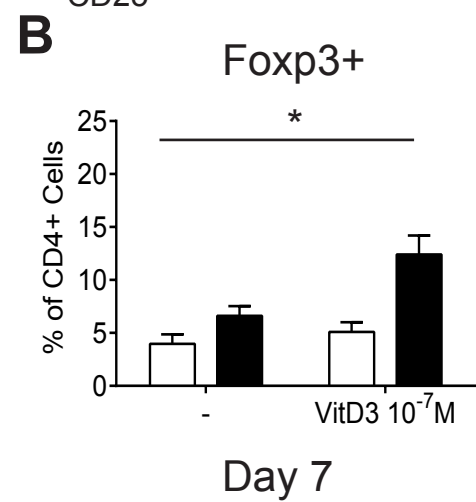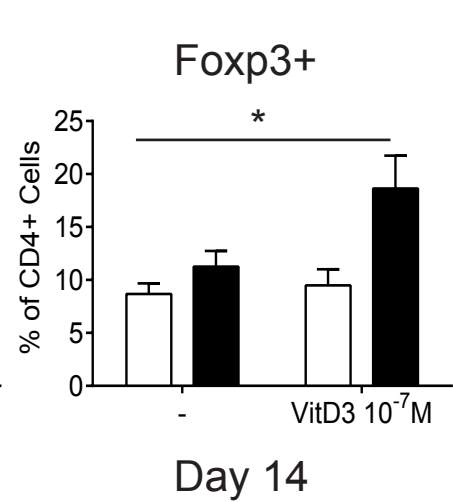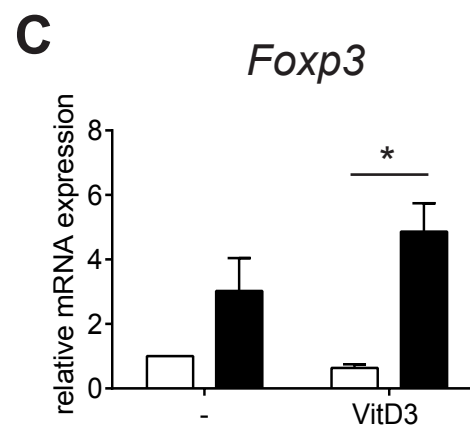

□ No Drugs  
 ■ + TGF $\beta$  and anti-IL-10R
